# Supplementary material
Source: Springer Nature journal article supplement (https://www.springermedizin.de/resource/supplementary/12879_2012_2513_MOESM2_ESM.pdf/9444750)

■ V monovalent (1st dose)    ■ MMR-V (1st dose)

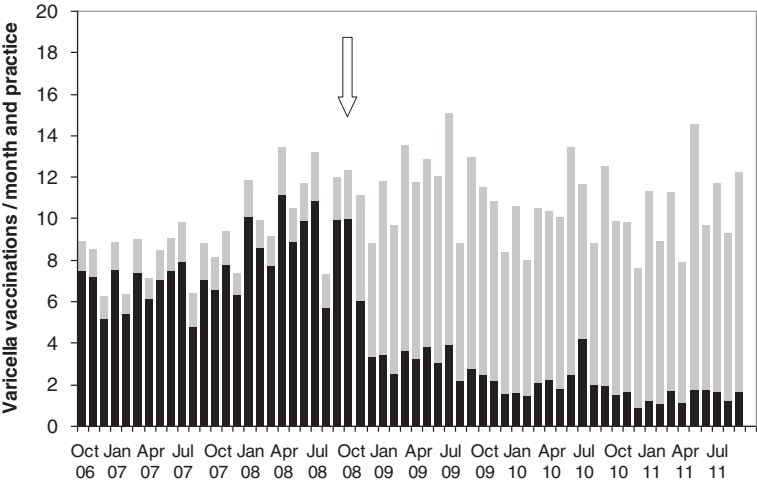

Supplement: MOESM2 [file 9444750]
